# Supplementary material
Source: PubMed Central journal article supplement (PMC2824781)

**A**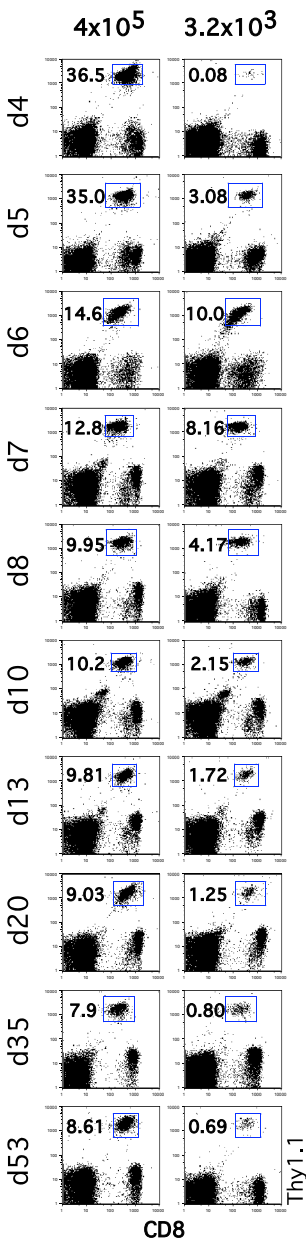**B**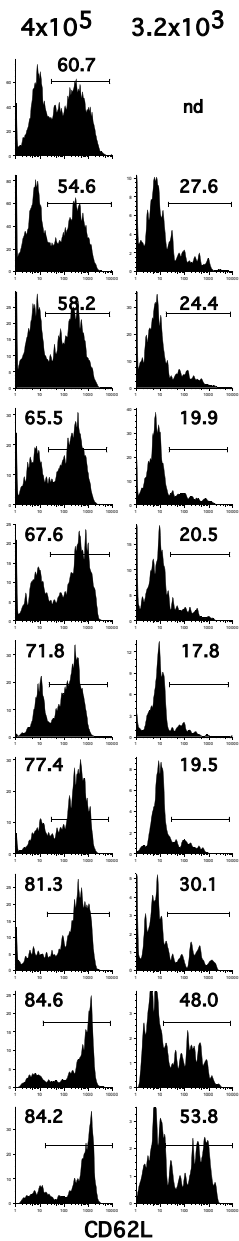

Supplement: NIHMS146122-supplement-3.pdf [file NIHMS146122-supplement-3.pdf]

Transfer Amount: 400 000

Transfer Amount: 3 200

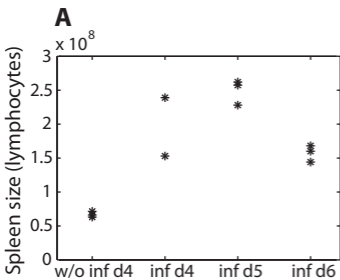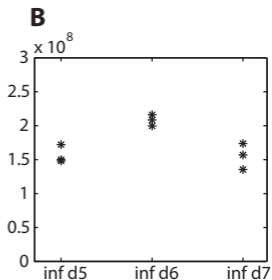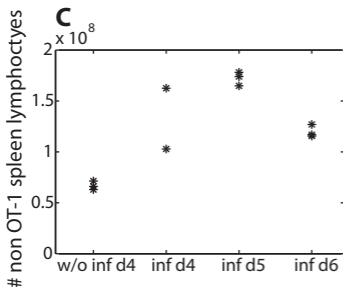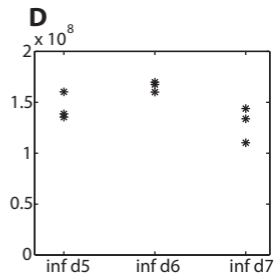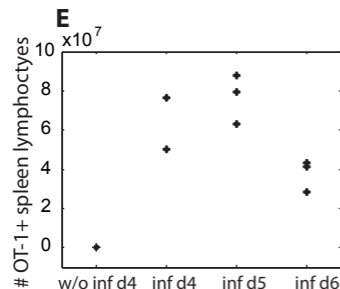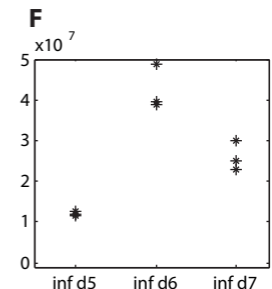

Day post infection or transfer

Supplement: NIHMS146122-supplement-4.pdf [file NIHMS146122-supplement-4.pdf]
